# Supplementary material for: Hypoglycemic Mechanism of the Berberine Organic Acid Salt under the Synergistic Effect of Intestinal Flora and Oxidative Stress
Source: Oxid Med Cell Longev. 2018 Dec 19;2018:8930374. doi: 10.1155/2018/8930374 (PMC6313974; doi:10.1155/2018/8930374)
Supplement: Supplementary Materials — The corresponding experimental data associated with this article can be seen from the supplementary material files. [file 8930374.f1.xlsx]

## Sheet: Sheet1
GROUP		NC								T2D								Me								BF
The plasma index	BFG	5.822	6.102	8.007	7.112	4.961	4.823	5.795	4.828	15.051	14.588	10.526	13.283	14.682	13.809	9.095	12.865	7.727	8.963	6.646	5.966	5.545	7.982	6.902	7.855	6.814	7.094	7.546	7.108	8.334	7.405	5.588	7.187
	FINS	15.668	15.865	12.101	19.843	18.584	15.814	14.825	10.457	9.816	11.789	8.948	10.778	10.799	9.841	10.045	10.801	12.801	17.824	10.931	18.723	15.353	10.814	12.464	11.767	12.823	11.849	18.011	12.802	10.847	12.711	13.785	10.481
	HOMA-IR	4.054	4.303	4.306	6.272	4.098	3.39	3.818	2.244	6.566	7.643	4.186	6.363	7.047	6.04	4.06	6.176	4.396	7.1	3.229	4.965	3.784	3.836	3.823	4.108	3.883	3.736	6.04	4.044	4.018	4.183	3.424	3.348
	TG	2.162	1.68	1.85	1.57	1.83	1.598	1.542	2.047	4.058	3.472	2.822	3.347	3.552	3.424	3.752	3.547	1.955	2.018	2.186	1.852	1.714	1.857	1.962	2.053	2.129	2.085	1.898	2.073	2.112	1.951	1.974	1.582
	TC	0.872	0.832	0.784	0.831	1.313	0.891	0.906	0.803	1.595	1.435	1.503	1.438	1.301	1.435	1.706	1.551	1.145	0.818	0.832	0.901	0.918	1.02	1.667	0.843	1.473	0.927	1.011	0.873	0.821	0.993	1.626	0.681
	T-SOD	292.7	251.2	237.3	240.5	220.1	247.8	259.2	245.4	195.3	190.2	185.3	171.5	200.2	191.6	195.7	190.4	225.4	216.6	203.7	220.2	260.8	223.3	269.1	231.9	218.4	237.6	207.8	249.4	210.1	260.5	220.5	261
	GSP	18.41	17.82	17.95	20.79	18.52	14.94	18.25	20.16	29.56	30.02	32.44	31.36	33.95	30.04	34.01	31.82	21.37	20.54	20.17	17.63	20.15	20.13	16.86	23.14	21.15	19.87	20.95	16.35	21.29	19.01	20.81	21.91
	GSH-PX	835.5	825.4	718.1	847.2	842.2	860.7	834.9	837.9	721.2	639.1	790.6	677.7	737.5	681.6	730.9	704.4	854.3	864.8	810.6	767.7	769.6	775.2	781.1	847.1	781.7	702.6	738.4	877.3	728.1	893.1	786.5	787.7
	GLP-1	10.93	12.82	13.84	10.69	9.83	8.94	7.63	12.24	3.68	3.94	4.12	5.07	4.69	3.82	4.21	6.96	10.01	8.38	8.62	7.57	7.85	13.06	9.93	12.02	9.87	7.28	9.12	10.82	6.66	12.04	10.18	9.27
Relative levels of protein	TLR4	1.83431	4.85992	4.01177	1.65746	2.85808	5.0814	1.52627	3.43674	8.5897	8.1047	7.6107	8.45414	8.64406	8.46851	7.74148	8.52039	3.74263	2.50271	3.94992	4.36631	5.83923	3.78466	4.35568	3.82491	4.29744	3.01086	2.67828	8.07317	5.6988	3.69452	3.87944	2.53904
	PI3K	7.58295	7.09359	8.51944	9.31995	8.89441	6.70996	7.77257	7.00798	3.80007	3.82158	2.29592	5.56295	4.42723	5.50818	4.40128	3.00711	4.19564	7.38181	4.43782	7.40966	5.28223	7.58144	8.36352	7.84478	8.13192	7.52038	9.03773	7.10679	5.94165	6.7105	4.89368	6.33595
	GLUT2	5.77092	7.02519	8.03883	7.55471	9.01825	6.16006	8.58078	7.47763	3.31902	3.84036	3.13117	3.91371	3.724	3.00341	1.69511	3.16641	6.19575	6.98961	7.90749	7.5963	4.17681	4.68309	5.18787	9.1726	7.26698	9.05859	6.54162	3.96109	4.15916	4.66012	6.94539	6.75399
	JNK	3.73114	2.93287	2.69679	1.18877	4.28427	1.88443	3.15329	3.96537	6.85868	7.71059	6.80116	9.26174	7.4268	5.55593	4.46694	9.79993	3.82623	2.61771	4.28898	7.66123	4.64481	3.61779	1.53823	3.63991	4.50571	3.11085	2.73968	5.29338	6.37958	3.59992	3.12917	3.25336
	LBP	40.83	41.06	35.68	44.02	38.82	42.58	47.37	39.84	61.37	75.02	58.33	62.04	59.73	72.82	68.93	66.82	47.38	38.29	50.38	58.33	53.98	46.29	45.28	34.67	48.28	49.28	44.27	50.62	52.44	40.82	41.33	36.92
Relative levels of mRNA	TLR4	4	3.65	3.92	2.82	3.32	2.68	2.05	3.17	7.56	8.53	8.18	6.67	7.26	6.62	6.83	7.53	2.08	3.81	2.76	4.05	4.14	3.07	3.68	3.34	3.87	2.92	5.01	3.91	4.21	3.69	3.02	3.06
	PI3K	8.04	7.36	6.41	8.06	8.02	6.63	7.13	6.65	4.25	5.3	4.06	3.02	3.66	3.36	4.1	3.69	6.22	8.37	8.14	6.26	5.4	5.62	6.05	5.66	7.08	6.72	6.31	7.1	5.92	7.78	6.03	5.07
	GLUT2	6.06	7.97	6.53	5.39	9.34	7.4	8.12	8.21	3.63	2.86	4.16	3.23	2.87	2.23	3.07	2.02	6.35	5.5	4.9	6.49	7.06	8.29	7.76	6.64	7.19	6.39	7.74	6.84	5.39	5.77	8.02	4.64
	JNK	2.76	1.78	2.68	2.96	2.1	2.97	3.07	2.57	7.43	5.93	5.2	5.2	6.42	7.28	7.02	7.04	3.87	1.81	3.18	2.94	2.92	2.47	3.02	3.86	5.04	2.52	4.7	4.15	1.68	2.39	2.84	4.92
